# Supplementary material for: Functional Validation of cas9/guideRNA Constructs for Site-directed Mutagenesis of Triticale ABA8’OH1 loci
Source: Preprints.org preprint supplement (doi:10.20944/preprints202105.0333.v1), 2021-05-14
Supplement: Supplementary file 1 [file supplementary]

[illegible]

|   |                        |        |        |      |                                                                                  |               |           |          |          |         |                                            |        |
|---|------------------------|--------|--------|------|----------------------------------------------------------------------------------|---------------|-----------|----------|----------|---------|--------------------------------------------|--------|
|   |                        | cov    | pid    | 1041 | :                                                                                | .             | .         | .        | .        | 1       | .                                          | 1120   |
| 1 | AB714574.1[genA_ex1-3] | 100.0% | 100.0% |      | CGGCGACAACCCCGCGTCCTCAAAGCCGTCACGtaagtcgccgtcatttc                               | catgaacc      | cagctg    | acccgct  | aggcacc  |         |                                            |        |
| 2 | TsABA8'OH-A            | 77.9%  | 99.9%  |      | CGGCGACAACCCCGCGTCCTCAAAGCCGTCACGtaagtcgccgtcatttc                               | catgaacc      | cagctg    | acccgct  | aggcacc  |         |                                            |        |
| 3 | TsABA8'OH-B            | 76.2%  | 94.3%  |      | CGGCGACAACCCCGCGTGCTCAAAGCCGTCACGtaagtcgcca                                      | ca-----       | ccagctg   | acccgctt | ggtaccc  |         |                                            |        |
| 4 | TsABA8'OH-R            | 77.0%  | 92.3%  |      | CGGCGACAACCCCGCGTCCTCAAAGCCGTCACGtaagtcgcca                                      | catatttc      | catgaacca | -gctg    | acccgctt | ggtgccc |                                            |        |
|   |                        | cov    | pid    | 1121 | .                                                                                | .             | :         | .        | .        | .       | .                                          | 2 1200 |
| 1 | AB714574.1[genA_ex1-3] | 100.0% | 100.0% |      | gatcga                                                                           | aaagcagcgactg | accc---   | gttc     | atcata   | caatca  | acagGAAGAGCACGCCGAGATCGCGAGGGAGAAGGCGT     |        |
| 2 | TsABA8'OH-A            | 77.9%  | 99.9%  |      | gatcga                                                                           | aaagcagcgactg | accc---   | gttc     | atcata   | caatca  | acagGAAGAGCACGCCGAGATCGCGAGGGAGAAGGCGT     |        |
| 3 | TsABA8'OH-B            | 76.2%  | 94.3%  |      | gatcga                                                                           | aaagcagcgactg | accc---   | gtg      | catc     | caaca   | atcaacagGAAGAGCATGCCGAGATCGCGAGGGAGAAGGCGT |        |
| 4 | TsABA8'OH-R            | 77.0%  | 92.3%  |      | gatcga                                                                           | aaagcagcgactg | accc---   | gtg      | catc     | caaca   | atcaacagGAAGAGCATGCCGAGATCGCGAGGGAGAAGGCGT |        |
|   |                        | cov    | pid    | 1201 | .                                                                                | .             | :         | .        | .        | .       | .                                          | 1280   |
| 1 | AB714574.1[genA_ex1-3] | 100.0% | 100.0% |      | TGTCCGGCGAGGCGCTGTCGTGGGCCGACACGCGCGGATGCGGTTGACGGGCCGGGTGATCCAGGAGACGATGCGGGTG  |               |           |          |          |         |                                            |        |
| 2 | TsABA8'OH-A            | 77.9%  | 99.9%  |      | TGTCCGGCGAGGCGCTGTCGTGGGCCGACACGCGCGGATGCGGTTGACGGGCCGGGTGATCCAGGAGACGATGCGGGTG  |               |           |          |          |         |                                            |        |
| 3 | TsABA8'OH-B            | 76.2%  | 94.3%  |      | TGTCCGGCGAGCCGCTGTCGTGGGCCGACACGCGCGGATGCGGATGACGGGCCGGGTGATCCAGGAGACGATGCGGGTG  |               |           |          |          |         |                                            |        |
| 4 | TsABA8'OH-R            | 77.0%  | 92.3%  |      | TGTCCGGCGAGCCGCTGTCGTGGGCCGACACGCGCGGATGCGGGTGACGGGGCGGGGTGATCCAGGAGACGATGCGGGTG |               |           |          |          |         |                                            |        |
|   |                        | cov    | pid    | 1281 | .                                                                                | 3             | .         | .        | .        | .       | .                                          | ] 1335 |
| 1 | AB714574.1[genA_ex1-3] | 100.0% | 100.0% |      | GCGTCCATCCTCTCCTTCACCTTCAGGGAGGCCGTGGAGGACGTGGAGTACCAAG                          |               |           |          |          |         |                                            |        |
| 2 | TsABA8'OH-A            | 77.9%  | 99.9%  |      | G-----                                                                           | ABA uR        | -----     |          |          |         |                                            |        |
| 3 | TsABA8'OH-B            | 76.2%  | 94.3%  |      | G-----                                                                           |               | -----     |          |          |         |                                            |        |
| 4 | TsABA8'OH-R            | 77.0%  | 92.3%  |      | G-----                                                                           |               | -----     |          |          |         |                                            |        |

**Figure S1.** TsABA8'OH partial sequences of Triticale cv. Bogo (NCBI MW538321-MW538323) generated with Clustal Omega and visualized with MView on-line tools [47-48]. Sequences were aligned to common wheat genome A reference sequence of ABA 8'-hydroxylase. Primers and gRNAs used in this study were marked with black boxes. Notice NSP in R genome sequence of ABA/1/364 and site for introduced mismatches in genome specific primers Aex3R, Bex3R and Rex3R (marked with red boxes, compare to Table S1).
