# Supplementary material for: Functional Validation of cas9/guideRNA Constructs for Site-directed Mutagenesis of Triticale ABA8’OH1 loci
Source: Preprints.org preprint supplement (doi:10.20944/preprints202105.0333.v1), 2021-05-14
Supplement: Supplementary file 1 [file Table S1.docx]

**Table S1.** Primers used for PCR amplifications and sequencing. Mismatches are indicated in red. Underlined are the sequences used for NGS library construction.

| **Name** | **Sequence (5’-3’)** | **Application** |
| --- | --- | --- |
| ABA_uF | TACTCCTCCAAGAACCCCAAC | Pair of common primers used for amplification of TsABA8’OH sequences prior to cloning and Sanger sequencing |
| ABA_uR | AAGGTGAAGGAGAGGATGGA |
| ABA2_ngsF | TCGTCGGCAGCGTCAGATGTGTATAAGAGACAGAAGAACCCCAACGTCTTCTT | Pair of common primers used for amplification of sequences targeted by gRNA-ABA/1/364 prior to deep sequencing. Library construction adapters were underlined. |
| ABA2_ngsR | GTCTCGTGGGCTCGGAGATGTGTATAAGAGACAGGCACTCACAGTCTTCATCTC |
| ABA3_ngsF | TCGTCGGCAGCGTCAGATGTGTATAAGAGACAGATTGTGGCCCACATCATCTC | Pair of common primers used for amplification of sequences targeted by gRNA-ABA/2/323 prior to deep sequencing. Library construction adapters were underlined. |
| ABA3_ngsR | GTCTCGTGGGCTCGGAGATGTGTATAAGAGACAGCCTTCTCCCTCGCGATCTC |
| RABex1F | GGCCCATCTTCAAGACGCA | Common forward primer used in pairs with one of three genome specific primers in T7EI assay. |
| Aex3R | GGCGTGCTCTTCCTGTTGATTGAAT | Genome A-specific primer used for PCR amplification in T7EI assay. Notice additional mismatch introduced to improve its specificity in third position to 3’ end (marked red). |
| Bex3R | GGCATGCTCTTCCTGTTAATTGATG | Genome B-specific primer used for PCR amplification in T7EI assay. Notice additional mismatch introduced to improve its specificity in third position to 3’ end (marked red). |
| Rex3R | AGCGTGCTCTTCCTGTTATTTGATC | Genome R-specific primer used for PCR amplification in T7EI assay. Notice additional mismatch introduced to improve its specificity in third position to 3’ end (marked red). |
