# Supplementary material for: Functional Validation of cas9/guideRNA Constructs for Site-directed Mutagenesis of Triticale ABA8’OH1 loci
Source: Preprints.org preprint supplement (doi:10.20944/preprints202105.0333.v1), 2021-05-14
Supplement: Supplementary file 3 [file Table S3..xlsx]

## Sheet: Table S3A
ANOVA results
	Source	Sum of squares	df	Mean squares	F-statistic	p
Total	Genome	0.052715	2	0.026357	0.6328	0.537447
	Error	1.37461	33	0.041655
gRNA-ABA/1/364	Genome	0.087764	2	0.043882	9.777	0.012944
	Error	0.02693	6	0.004488
gRNA-ABA/1/364 +TREX2	Genome	0.022678	2	0.011339	1.576	0.281785
	Error	0.04317	6	0.007195
gRNA-ABA/2/323	Genome	0.022025	2	0.011013	22.4204	0.001644
	Error	0.002947	6	0.000491
gRNA-ABA/2/323 +TREX2	Genome	0.004099	2	0.00205	0.3634	0.709633
	Error	0.033843	6	0.00564
Homogeneous groups obtained by Tukey's multiple comparison procedure at significance level α=0,05
Genome	Total		gRNA-ABA/1/364		gRNA-ABA/1/364+TREX2		gRNA-ABA/2/323		gRNA-ABA/2/323+TREX2
	Mean	Group	Mean	Group	Mean	Group	Mean	Group	Mean	Group
Genome A	12.3895	a	6.14706	a	20.0584	a	0.229103	a	23.1233	a
Genome B	18.9047	a	15.5846	ab	32.0419	a	1.43003	b	24.5259	a
Genome R	18.3956	a	24.4908	b	23.0704	a	0	a	28.0575	a

## Sheet: Table S3B
ANOVA results
	Source	Total					Genome A					Genome B					Genome R
		Sum of squares	df	Mean squares	F-statistic	p	Sum of squares	df	Mean squares	F-statistic	p	Sum of squares	df	Mean squares	F-statistic	p	Sum of squares	df	Mean squares	F-statistic	p
Deletions
1 bp	Constructs	2.33198	3	0.777326	358.503	0	0.695574	3	0.231858	68.8194	5e-06	0.790664	3	0.263555	142.82	0	0.853589	3	0.28453	116.234	1e-06
	Error	0.069384	32	0.002168			0.026953	8	0.003369			0.014763	8	0.001845			0.019583	8	0.002448
2-10 bp	Constructs	0.3379	3	0.112633	32.267	0	0.095396	3	0.031799	12.1666	0.002378	0.094723	3	0.031574	9.1446	0.005787	0.160464	3	0.053488	8.7677	0.006564
	Error	0.1117	32	0.003491			0.020909	8	0.002614			0.027622	8	0.003453			0.048805	8	0.006101
11-99 bp	Constructs	4.08665	3	1.36222	603.628	0	1.26542	3	0.421808	102.252	1e-06	1.219	3	0.406335	842.24	0	1.61956	3	0.539853	284.98	0
	Error	0.07222	32	0.00226			0.033001	8	0.004125			0.00386	8	0.000482			0.015155	8	0.001894
≥100 bp	Constructs	0.080194	3	0.026731	10.0003	8.4e-05	0.028139	3	0.00938	7.93413	0.008804	0.014078	3	0.004693	4.48316	0.039852	0.044792	3	0.014931	2.61907	0.12284
	Error	0.085538	32	0.002673			0.009457	8	0.001182			0.008374	8	0.001047			0.045606	8	0.005701
Insertions
1 bp	Constructs	1.4061	3	0.4687	142.71	0	0.402375	3	0.134125	30.5751	9.9e-05	0.533501	3	0.177834	23.6385	0.000249	0.474987	3	0.158329	458.14	0
	Error	0.105097	32	0.003284			0.035094	8	0.004387			0.060184	8	0.007523			0.002765	8	0.000346
2-10 bp	Constructs	0.000513	3	0.000171	0.807987	0.498801	0.000174	3	5.8e-05	1	0.441099	0.001729	3	0.000576	1	0.441099
	Error	0.006767	32	0.000211			0.000463	8	5.8e-05			0.004612	8	0.000576
11-99 bp	Constructs	0.069254	3	0.023085	4.51588	0.009456	0.058777	3	0.019592	1.50305	0.286166	0.034808	3	0.011603	7.21986	0.011531	0.001824	3	0.000608	1.44022	0.301534
	Error	0.16358	32	0.005112			0.10428	8	0.013035			0.012856	8	0.001607			0.003378	8	0.000422
≥100 bp	Constructs	0.000522	3	0.000174	1.64924	0.197562	0.000503	3	0.000168	0.755561	0.549539						0.000296	3	9.9e-05	0.715956	0.569645
	Error	0.003376	32	0.000105			0.001777	8	0.000222								0.001103	8	0.000138
Substitutions
1 bp	Constructs	0.031239	3	0.010413	1.89038	0.15107	0.021992	3	0.007331	0.507162	0.688188	0.01374	3	0.00458	2.80305	0.108366	0.012551	3	0.004184	1.28617	0.343543
	Error	0.17627	32	0.005508			0.115635	8	0.014454			0.013072	8	0.001634			0.026022	8	0.003253
2-10 bp	Constructs	0.00557	3	0.001857	3.07716	0.041427	0.000463	3	0.000154	0.428198	0.738363	0.002096	3	0.000699	2.30879	0.153054	0.004617	3	0.001539	1	0.441099
	Error	0.019309	32	0.000603			0.002884	8	0.00036			0.002421	8	0.000303			0.012313	8	0.001539
11-99 bp	Constructs	0.020139	3	0.006713	4.19957	0.012963	0.000402	3	0.000134	0.762023	0.546329	0.034665	3	0.011555	5.78989	0.021029	0.003195	3	0.001065	32.3571	8e-05
	Error	0.051152	32	0.001599			0.001408	8	0.000176			0.015966	8	0.001996			0.000263	8	3.3e-05
Complex
1 bp	Constructs	0.028731	3	0.009577	12.7588	1.2e-05	0.010021	3	0.00334	2.82688	0.106649	0.01579	3	0.005263	10.0091	0.004395	0.008728	3	0.002909	5.87572	0.020231
	Error	0.024019	32	0.000751			0.009453	8	0.001182			0.004207	8	0.000526			0.003961	8	0.000495
Homogeneous groups obtained by Tukey's multiple comparison procedure at significance level α=0,05
	Contruct	Total		Genome A		Genome B		Genome R
		Mean	Group	Mean	Group	Mean	Group	Mean	Group
Deletions
1 bp	gRNA-ABA/1/364	0.40101	a	0.36859	a	0.24577	a	0.58866	a
	gRNA-ABA/1/364+TREX2	0.043	a	0.09266	a	0.03633	a	0	a
	gRNA-ABA/2/323	39.0219	b	36.2335	b	39.0561	b	41.776	b
	gRNA-ABA/2/323+TREX2	0.36013	a	0.8934	a	0.14526	a	0.04172	a
2-10 bp	gRNA-ABA/1/364	29.1518	b	28.9235	b	30.4591	c	28.0728	ab
	gRNA-ABA/1/364+TREX2	12.4268	a	14.0368	a	12.0026	a	12.3066	a
	gRNA-ABA/2/323	32.2781	b	32.6483	b	28.7027	bc	35.4832	b
	gRNA-ABA/2/323+TREX2	13.9719	a	14.4223	a	15.1868	ab	11.241	a
11-99 bp	gRNA-ABA/1/364	66.8141	b	66.0836	b	66.3029	b	68.056	b
	gRNA-ABA/1/364+TREX2	85.0851	c	83.8778	b	85.0075	c	86.37	b
	gRNA-ABA/2/323	1.9804	a	2.81804	a	2.4584	a	0.66477	a
	gRNA-ABA/2/323+TREX2	83.4426	c	82.599	b	83.638	c	84.0909	b
≥100 bp	gRNA-ABA/1/364	0.297063	a	0.281452	ab	0.035765	ab	0.573971	a
	gRNA-ABA/1/364+TREX2	1.83476	b	1.60387	b	0.886566	b	2.03475	a
	gRNA-ABA/2/323	0	a	0	a	0	a	0	a
	gRNA-ABA/2/323+TREX2	1.43579	b	1.38606	b	0.410171	ab	3.49024	a
Insertions
1 bp	gRNA-ABA/1/364	0.04514	a	0.02541	a	0.0416	a	0.06841	a
	gRNA-ABA/1/364+TREX2	0.00611	a	0	a	0.01833	a	0	a
	gRNA-ABA/2/323	22.3989	b	19.2885	b	26.3071	b	21.6012	b
	gRNA-ABA/2/323+TREX2	0	a	0	a	0	a	0	a
2-10 bp	gRNA-ABA/1/364	0	a	0	a	0	a
	gRNA-ABA/1/364+TREX2	0.007721	a	0.023164	a	0	a
	gRNA-ABA/2/323	0.07686	a	0	a	0.230581	a
	gRNA-ABA/2/323+TREX2	0	a	0	a	0	a
11-99 bp	gRNA-ABA/1/364	0.447902	ab	0.55098	a	0.659682	ab	0.133044	a
	gRNA-ABA/1/364+TREX2	0.028145	a	0.021104	a	0.063331	a	0	a
	gRNA-ABA/2/323	2.81805	b	6.3449	a	2.01427	b	0.094967	a
	gRNA-ABA/2/323+TREX2	0	a	0	a	0	a	0	a
≥100 bp	gRNA-ABA/1/364	0.03888	a	0.074627	a			0.042012	a
	gRNA-ABA/1/364+TREX2	0.009122	a	0.014221	a			0.013146	a
	gRNA-ABA/2/323	0	a	0	a			0	a
	gRNA-ABA/2/323+TREX2	0	a	0	a			0	a
Substitutions
1 bp	gRNA-ABA/1/364	1.42579	a	3.01217	a	0.166407	a	1.23175	a
	gRNA-ABA/1/364+TREX2	0.053181	a	0.014221	a	0.145322	a	0	a
	gRNA-ABA/2/323	1.47011	a	2.66667	a	1.23084	a	0.379867	a
	gRNA-ABA/2/323+TREX2	0.130381	a	0.088621	a	0.302522	a	0	a
2-10 bp	gRNA-ABA/1/364	0.289782	b	0.079793	a	0.173889	a	0.615665	a
	gRNA-ABA/1/364+TREX2	0.00474	ab	0.014221	a	0	a	0	a
	gRNA-ABA/2/323	0	a	0	a	0	a	0	a
	gRNA-ABA/2/323+TREX2	0.016721	ab	0.050163	a	0	a	0	a
11-99 bp	gRNA-ABA/1/364	0.327937	ab	0.059844	a	0.923967	ab	0	a
	gRNA-ABA/1/364+TREX2	0.653978	b	0.010552	a	1.8006	b	0.150782	b
	gRNA-ABA/2/323	0	a	0	a	0	a	0	a
	gRNA-ABA/2/323+TREX2	0	a	0	a	0	a	0	a
Complex
1 bp	gRNA-ABA/1/364	0.716347	c	0.540421	a	0.990916	b	0.617705	b
	gRNA-ABA/1/364+TREX2	0.24634	b	0.509207	a	0.039441	a	0.190371	ab
	gRNA-ABA/2/323	0	a	0	a	0	a	0	a
	gRNA-ABA/2/323+TREX2	0.243478	b	0.342668	a	0.317298	ab	0.070469	ab

## Sheet: Table S3C
ANOVA results
	Source	Sum of squares	df	Mean squares	F-statistic	p
Total	Genome	0.002198	2	0.001099	0.107	0.898795
	Error	0.338763	33	0.010266
gRNA-ABA/1/364	Genome	0.000436	2	0.000218	0.2119	0.814877
	Error	0.006181	6	0.00103
gRNA-ABA/1/364+TREX2	Genome	0.001991	2	0.000995	0.4395	0.663565
	Error	0.01359	6	0.002265
gRNA-ABA/2/323	Genome	0.002345	2	0.001172	1.8796	0.232386
	Error	0.003743	6	0.000624
gRNA-ABA/2/323+TREX2	Genome	0.004762	2	0.002381	0.4947	0.632586
	Error	0.028873	6	0.004812
Homogeneous groups obtained by Tukey's multiple comparison procedure at significance level α=0,05
Genome	Total		gRNA-ABA/1/364		gRNA-ABA/1/364+TREX2		gRNA-ABA/2/323		gRNA-ABA/2/323+TREX2
	Mean	Group	Mean	Group	Mean	Group	Mean	Group	Mean	Group
Genome A	0.06844	a	0.06043	a	0.12643	a	0.084384	a	0.101239	a
Genome B	0.07462	a	0.070535	a	0.101239	a	0.12355	a	0.12643	a
Genome R	0.072191	a	0.065013	a	0.114893	a	0.108651	a	0.114893	a
